# Supplementary material
Source: ML conference proceedings conference paper supplement (https://proceedings.mlr.press/v139/gupta21c.html)
Supplement: Supplementary file 1 [file gupta21c-supp.pdf]

## A. Bias and Variance

**Lemma A.1.** Let  $X \sim \text{Bernoulli}(\theta)$  and  $Y = aX + b(1 - X)$ , where  $a$  and  $b$  are some constants. Then

$$\text{Var}(Y) = \theta(1 - \theta)(a - b)^2.$$

### Proof of Lemma 3.1

**Lemma.** The bias and variance of  $\hat{R}_{\text{naive}}(\hat{o})$  are

$$\begin{aligned} \mathbf{B}(\hat{R}_{\text{naive}}) &= \left| \mathbf{E}[\hat{R}_{\text{naive}}] - R(\hat{o}) \right| \\ &= \frac{\Delta}{|\mathcal{U}|} \left| \sum_{(i,j) \in \mathcal{U}} y_{ij}(1 - \pi_{ij})(1 - 2\hat{o}_{ij}) \right|, \\ \text{Var}(\hat{R}_{\text{naive}}) &= \frac{\Delta^2}{|\mathcal{U}|^2} \sum_{(i,j) \in \mathcal{U}} y_{ij}\pi_{ij}(1 - y_{ij}\pi_{ij}). \end{aligned}$$

*Proof.* We have

$$\begin{aligned} \hat{R}_{\text{naive}}(o, \hat{y}) &= \frac{1}{|\mathcal{U}|} \sum_{(i,j) \in \mathcal{U}} \delta(o_{ij}, \hat{o}_{ij}) \\ &= \frac{1}{|\mathcal{U}|} \sum_{(i,j) \in \mathcal{U}} [o_{ij}\delta(1, \hat{o}_{ij}) + (1 - o_{ij})\delta(0, \hat{o}_{ij})] \\ \therefore \mathbf{E}_o[\hat{R}_{\text{naive}}(o, \hat{y})] &= \frac{1}{|\mathcal{U}|} \sum_{(i,j) \in \mathcal{U}} [y_{ij}\pi_{ij}\delta(1, \hat{o}_{ij}) + (1 - y_{ij}\pi_{ij})\delta(0, \hat{o}_{ij})] \\ &= \frac{1}{|\mathcal{U}|} \sum_{(i,j) \in \mathcal{U}} [y_{ij}\pi_{ij}(1 - \hat{o}_{ij})\delta(1, 0) + (1 - y_{ij}\pi_{ij})\hat{o}_{ij}\delta(0, 1)] \\ &= \frac{\Delta}{|\mathcal{U}|} \sum_{(i,j) \in \mathcal{U}} [y_{ij}\pi_{ij}(1 - \hat{o}_{ij}) + (1 - y_{ij}\pi_{ij})\hat{o}_{ij}]. \end{aligned}$$

The true risk is

$$\begin{aligned} R(\hat{y}) &= \frac{1}{|\mathcal{U}|} \sum_{(i,j) \in \mathcal{U}} [y_{ij}\delta(1, \hat{o}_{ij}) + (1 - y_{ij})\delta(0, \hat{o}_{ij})] \\ &= \frac{1}{|\mathcal{U}|} \sum_{(i,j) \in \mathcal{U}} [y_{ij}(1 - \hat{o}_{ij})\delta(1, 0) + (1 - y_{ij})\hat{o}_{ij}\delta(0, 1)] \\ &= \frac{\Delta}{|\mathcal{U}|} \sum_{(i,j) \in \mathcal{U}} [y_{ij}(1 - \hat{o}_{ij}) + (1 - y_{ij})\hat{o}_{ij}]. \end{aligned}$$

Thus the bias is

$$\begin{aligned} \mathbf{B}(\hat{R}_{\text{naive}}) &= \left| \mathbf{E}[\hat{R}_{\text{naive}}] - R(\hat{o}) \right| \\ &= \left| \frac{\Delta}{|\mathcal{U}|} \sum_{(i,j) \in \mathcal{U}} [y_{ij}\pi_{ij}(1 - \hat{o}_{ij}) + (1 - y_{ij}\pi_{ij})\hat{o}_{ij} - y_{ij}(1 - \hat{o}_{ij}) - (1 - y_{ij})\hat{o}_{ij}] \right| \\ &= \frac{\Delta}{|\mathcal{U}|} \left| \sum_{(i,j) \in \mathcal{U}} y_{ij}(1 - \pi_{ij})(1 - 2\hat{o}_{ij}) \right|. \end{aligned}$$

The variance is

$$\begin{aligned}
 \text{Var}(\widehat{R}_{\text{naive}}) &= \text{Var}\left(\frac{1}{|\mathcal{U}|} \sum_{(i,j) \in \mathcal{U}} [o_{ij}\delta(1, \widehat{o}_{ij}) + (1 - o_{ij})\delta(0, \widehat{o}_{ij})]\right) \\
 &= \frac{1}{|\mathcal{U}|^2} \sum_{(i,j) \in \mathcal{U}} \text{Var}(o_{ij}\delta(1, \widehat{o}_{ij}) + (1 - o_{ij})\delta(0, \widehat{o}_{ij})) \\
 &= \frac{1}{|\mathcal{U}|^2} \sum_{(i,j) \in \mathcal{U}} y_{ij}\pi_{ij}(1 - y_{ij}\pi_{ij}) (\delta(1, \widehat{o}_{ij}) - \delta(0, \widehat{o}_{ij}))^2 \quad (\text{using Lemma A.1}) \\
 &= \frac{\Delta^2}{|\mathcal{U}|^2} \sum_{(i,j) \in \mathcal{U}} y_{ij}\pi_{ij}(1 - y_{ij}\pi_{ij}).
 \end{aligned}$$

□

Lemmas 3.2, 3.3, and 3.4 can be proved similarly.

### Proof of Theorem 3.1

**Theorem (Comparison of Variances).** *For all values of  $\widehat{\pi}, \widehat{y}$ , we have  $\text{Var}(\widehat{R}_{\text{AP}}) < \text{Var}(\widehat{R}_{\text{naive}})$ , and  $\text{Var}(\widehat{R}_{\text{AP}}) < \text{Var}(\widehat{R}_w) < \text{Var}(\widehat{R}_{\text{PU}})$*

*Proof.* First we show that  $\text{Var}(\widehat{R}_{\text{AP}}) < \text{Var}(\widehat{R}_{\text{naive}})$ . We have

$$\begin{aligned}
 \text{Var}(\widehat{R}_{\text{AP}}) &= \frac{\Delta^2}{|\mathcal{U}|^2} \sum_{(i,j) \in \mathcal{U}} y_{ij}\pi_{ij}(1 - y_{ij}\pi_{ij})\psi_{ij}^2, \\
 \text{where } \psi_{ij} &= \frac{1 - \widehat{y}_{ij}}{1 - \widehat{\pi}_{ij}\widehat{y}_{ij}} < 1, \\
 \text{Var}(\widehat{R}_{\text{naive}}) &= \frac{\Delta^2}{|\mathcal{U}|^2} \sum_{(i,j) \in \mathcal{U}} y_{ij}\pi_{ij}(1 - y_{ij}\pi_{ij}).
 \end{aligned}$$

Using the fact that  $\psi_{ij}^2 < 1 \forall (i, j) \in \mathcal{U}$ , we get  $\text{Var}(\widehat{R}_{\text{AP}}) < \text{Var}(\widehat{R}_{\text{naive}})$ .

Next, we show that  $\text{Var}(\widehat{R}_w) < \text{Var}(\widehat{R}_{\text{PU}})$ :

$$\begin{aligned}
 \text{Var}(\widehat{R}_w) &= \frac{\Delta^2}{|\mathcal{U}|^2} \sum_{(i,j) \in \mathcal{U}} y_{ij}\pi_{ij}(1 - y_{ij}\pi_{ij}) \left( \frac{1 - \widehat{o}_{ij}}{\widehat{\pi}_{ij}^2} + \widehat{o}_{ij}\psi_{ij}^2 \right) \\
 \text{Var}(\widehat{R}_{\text{PU}}) &= \frac{\Delta^2}{|\mathcal{U}|^2} \sum_{(i,j) \in \mathcal{U}} \frac{y_{ij}\pi_{ij}(1 - y_{ij}\pi_{ij})}{\widehat{\pi}_{ij}^2} \\
 &= \frac{\Delta^2}{|\mathcal{U}|^2} \sum_{(i,j) \in \mathcal{U}} y_{ij}\pi_{ij}(1 - y_{ij}\pi_{ij}) \left( \frac{1 - \widehat{o}_{ij}}{\widehat{\pi}_{ij}^2} + \frac{\widehat{o}_{ij}}{\widehat{\pi}_{ij}^2} \right) \\
 \therefore \text{Var}(\widehat{R}_w) - \text{Var}(\widehat{R}_{\text{PU}}) &= \frac{\Delta^2}{|\mathcal{U}|^2} \sum_{(i,j) \in \mathcal{U}} y_{ij}\pi_{ij}(1 - y_{ij}\pi_{ij})\widehat{o}_{ij} \left( \psi_{ij}^2 - \frac{1}{\widehat{\pi}_{ij}^2} \right) \\
 \therefore \text{Var}(\widehat{R}_w) - \text{Var}(\widehat{R}_{\text{PU}}) &< 0 \quad \left( \text{because } \psi_{ij} < 1 \text{ and } \frac{1}{\widehat{\pi}_{ij}^2} > 1 \right) \\
 \therefore \text{Var}(\widehat{R}_w) &< \text{Var}(\widehat{R}_{\text{PU}}).
 \end{aligned}$$

Next, we show that  $\text{Var}(\widehat{R}_{AP}) < \text{Var}(\widehat{R}_w)$ :

$$\begin{aligned} \text{Var}(\widehat{R}_{AP}) - \text{Var}(\widehat{R}_w) &= \frac{\Delta^2}{|\mathcal{U}|^2} \sum_{(i,j) \in \mathcal{U}} y_{ij} \pi_{ij} (1 - y_{ij} \pi_{ij}) (1 - \widehat{o}_{ij}) \left( \psi_{ij}^2 - \frac{1}{\widehat{\pi}_{ij}^2} \right) \\ \therefore \text{Var}(\widehat{R}_{AP}) - \text{Var}(\widehat{R}_w) &< 0 \quad \left( \text{because } \psi_{ij} < 1 \text{ and } \frac{1}{\widehat{\pi}_{ij}} > 1 \right) \\ \therefore \text{Var}(\widehat{R}_{AP}) &< \text{Var}(\widehat{R}_w). \end{aligned}$$

□

### Proof of Theorem 3.2

**Theorem (Comparison of Biases).** *Under the bias approximations, a sufficient condition for  $B(\widehat{R}_w) = B(\widehat{R}_{PU}) < B(\widehat{R}_{naive})$  is*

$$\frac{\pi_{ij}}{2 - \pi_{ij}} < \widehat{\pi}_{ij} < 1, \quad \forall (i, j) \in \mathcal{U},$$

and for  $B(\widehat{R}_{AP}) < B(\widehat{R}_{naive})$  is

$$\begin{aligned} \frac{\pi_{ij}}{2 - \pi_{ij}} < \widehat{\pi}_{ij} < 1 \text{ and } 0 < \widehat{y}_{ij} < c y_{ij}, \quad \forall (i, j) \in \mathcal{U} \\ \text{where } c &= \frac{2(1 - \pi_{ij})}{1 - \widehat{\pi}_{ij} - \pi_{ij} y_{ij} + (2 - \pi_{ij}) \widehat{\pi}_{ij} y_{ij}} \geq 1. \end{aligned}$$

*Proof.* We first derive the sufficient condition for  $B(\widehat{R}_w) = B(\widehat{R}_{PU}) < B(\widehat{R}_{naive})$ . We have

$$\begin{aligned} B(\widehat{R}_{naive}) &\approx \frac{\Delta}{|\mathcal{U}|} \sum_{(i,j) \in \mathcal{U}'} y_{ij} (1 - \pi_{ij}), \\ B(\widehat{R}_w) \approx B(\widehat{R}_{PU}) &\approx \frac{\Delta}{|\mathcal{U}|} \left| \sum_{(i,j) \in \mathcal{U}'} y_{ij} \left( 1 - \frac{\pi_{ij}}{\widehat{\pi}_{ij}} \right) \right|. \end{aligned}$$

If  $1 > \widehat{\pi}_{ij} > \pi_{ij} \forall (i, j) \in \mathcal{U}$ , we have

$$\begin{aligned} \left( 1 - \frac{\pi_{ij}}{\widehat{\pi}_{ij}} \right) &> 0 \quad \forall (i, j) \in \mathcal{U} \\ \therefore B(\widehat{R}_w) \approx B(\widehat{R}_{PU}) &\approx \frac{\Delta}{|\mathcal{U}|} \sum_{(i,j) \in \mathcal{U}'} y_{ij} \left( 1 - \frac{\pi_{ij}}{\widehat{\pi}_{ij}} \right). \\ \therefore B(\widehat{R}_w) - B(\widehat{R}_{naive}) &= \frac{\Delta}{|\mathcal{U}|} \sum_{(i,j) \in \mathcal{U}'} y_{ij} \left( \pi_{ij} - \frac{\pi_{ij}}{\widehat{\pi}_{ij}} \right) \\ &= \frac{\Delta}{|\mathcal{U}|} \sum_{(i,j) \in \mathcal{U}'} y_{ij} \pi_{ij} \left( 1 - \frac{1}{\widehat{\pi}_{ij}} \right) \\ &< 0 \quad (\text{because } \widehat{\pi}_{ij} < 1) \\ \therefore B(\widehat{R}_w) &< B(\widehat{R}_{naive}). \end{aligned}$$

If  $0 < \widehat{\pi}_{ij} \leq \pi_{ij} \forall (i, j) \in \mathcal{U}$ , we have

$$\begin{aligned} \left( 1 - \frac{\pi_{ij}}{\widehat{\pi}_{ij}} \right) &\leq 0 \quad \forall (i, j) \in \mathcal{U} \\ \therefore B(\widehat{R}_w) \approx B(\widehat{R}_{PU}) &\approx \frac{\Delta}{|\mathcal{U}|} \sum_{(i,j) \in \mathcal{U}'} y_{ij} \left( \frac{\pi_{ij}}{\widehat{\pi}_{ij}} - 1 \right). \end{aligned}$$

Then, a sufficient condition for  $B(\widehat{R}_w) = B(\widehat{R}_{\text{PU}}) < B(\widehat{R}_{\text{naive}})$  is

$$\begin{aligned} y_{ij} \left( \frac{\pi_{ij}}{\widehat{\pi}_{ij}} - 1 \right) &< y_{ij}(1 - \pi_{ij}) \quad \forall (i, j) \in \mathcal{U} \\ \therefore y_{ij} \left( \frac{\pi_{ij}}{\widehat{\pi}_{ij}} - 1 \right) &< y_{ij}(1 - \pi_{ij}) \quad \forall (i, j) \in \mathcal{U} \\ \therefore \widehat{\pi}_{ij} &> \frac{2}{2 - \pi_{ij}} \quad \forall (i, j) \in \mathcal{U}. \end{aligned}$$

Next, we derive the sufficient condition for  $\widehat{R}_{\text{AP}} < \widehat{R}_{\text{naive}}$ . Observe that

$$\begin{aligned} \frac{\pi_{ij}}{2 - \pi_{ij}} &< \widehat{\pi}_{ij} < 1 \quad \forall (i, j) \in \mathcal{U} \\ \therefore (1 - \pi_{ij})y_{ij} - (1 - \pi_{ij}y_{ij})\tau_{ij} &\geq 0 \quad \forall (i, j) \in \mathcal{U} \\ \therefore \widehat{R}_{\text{AP}} &\approx \frac{\Delta}{|\mathcal{U}|} \sum_{(i,j) \in \mathcal{U}'} [(1 - \pi_{ij})y_{ij} - (1 - \pi_{ij}y_{ij})\tau_{ij}], \text{ where } \tau_{ij} = \left( \frac{\widehat{y}_{ij}(1 - \widehat{\pi}_{ij})}{1 - \widehat{\pi}_{ij}\widehat{y}_{ij}} \right). \end{aligned}$$

Therefore, when  $\frac{\pi_{ij}}{2 - \pi_{ij}} < \widehat{\pi}_{ij} < 1 \quad \forall (i, j) \in \mathcal{U}$ , a sufficient condition for  $\widehat{R}_{\text{AP}} < \widehat{R}_{\text{naive}}$  is

$$\begin{aligned} (1 - \pi_{ij})y_{ij} - (1 - \pi_{ij}y_{ij})\tau_{ij} &< y_{ij}(1 - \pi_{ij}) \quad \forall (i, j) \in \mathcal{U} \\ \therefore 0 < \widehat{y}_{ij} &< \left( \frac{2(1 - \pi_{ij})}{1 - \widehat{\pi}_{ij} - \pi_{ij}y_{ij} + (2 - \pi_{ij})\widehat{\pi}_{ij}y_{ij}} \right) y_{ij} \quad \forall (i, j) \in \mathcal{U}. \end{aligned}$$

□

## B. Generalization Bound

### Proof of Theorem 4.1

**Theorem (Generalization Bound).** *Let  $\mathcal{F}$  be a class of functions  $(\widehat{\pi}, \widehat{y})$ . Let  $\delta(o_{ij}, \widehat{y}_{ij}) \leq \eta \quad \forall (i, j) \in \mathcal{U}$  and  $\widehat{\pi}_{ij} \geq \epsilon > 0 \quad \forall (i, j) \in \mathcal{U}$ . Then, for  $\widehat{R} \in \{\widehat{R}_w, \widehat{R}_{\text{PU}}, \widehat{R}_{\text{AP}}\}$ , with probability at least  $1 - \delta$ , we have*

$$R(\widehat{y}) \leq \widehat{R}(\widehat{y}, \widehat{\pi}) + B(\widehat{R}) + 2\mathcal{G}(\mathcal{F}, \widehat{R}) + M \quad (6)$$

$$\leq \widehat{R}(\widehat{y}, \widehat{\pi}) + B(\widehat{R}_w) + 2\widehat{\mathcal{G}}(\mathcal{F}, \widehat{R}_w) + 3M, \quad (7)$$

where  $M = \sqrt{\frac{4\eta^2}{\epsilon^2|\mathcal{U}|} \log(\frac{2}{\delta})}$  and  $B(\widehat{R})$  is the bias of  $\widehat{R}$  derived in Section 3.

*Proof.* We proceed similarly to the standard Rademacher complexity generalization bound proof (Shalev-Shwartz & Ben-David, 2014)[Ch. 26]. Observe that

$$\begin{aligned} R(\widehat{y}) &= R(\widehat{y}) - \mathbf{E}_o[\widehat{R}(o, \widehat{y}, \widehat{\pi})] + \mathbf{E}_o[\widehat{R}(o, \widehat{y}, \widehat{\pi})] \\ &\leq B(\widehat{R}) + \mathbf{E}_o[\widehat{R}(o, \widehat{y}, \widehat{\pi})]. \end{aligned} \quad (8)$$

Let  $\Phi(o) = \sup_{(\widehat{\pi}, \widehat{y}) \in \mathcal{F}} [\mathbf{E}_o[\widehat{R}(o, \widehat{y}, \widehat{\pi})] - \widehat{R}(o, \widehat{y}, \widehat{\pi})]$ . Then

$$\mathbf{E}_o[\widehat{R}(o, \widehat{y}, \widehat{\pi})] \leq \widehat{R}(o, \widehat{y}, \widehat{\pi}) + \Phi(o). \quad (9)$$

Now we upper bound  $\Phi(o)$ . Since  $\delta(o_{ij}, \widehat{y}_{ij}) \leq \eta \quad \forall (i, j)$  and  $\widehat{\pi}_{ij} \geq \epsilon > 0, \quad \forall (i, j)$  and  $\forall \widehat{R} \in \{\widehat{R}_w, \widehat{R}_{\text{PU}}, \widehat{R}_{\text{AP}}\}$ , we have

$$|\Phi(o) - \Phi(\bar{o})| \leq \frac{2\eta}{\epsilon},$$

if  $o$  and  $\tilde{o}$  differ in only one coordinate, i.e.,  $o_{ij} \neq \tilde{o}_{ij}$  for some  $(i, j) \in \mathcal{U}$  and  $o_{lm} = \tilde{o}_{lm} \forall (l, m) \in \mathcal{U}$  s.t.  $(i, j) \neq (l, m)$ . Using McDiarmid's Inequality, with probability at least  $1 - \delta$ , we have

$$\Phi(o) \leq \mathbf{E}[\Phi(o)] + C. \quad (10)$$

Next, we upper bound  $\mathbf{E}[\Phi(o)]$ . Let  $\bar{o}$  be a ghost sample independently drawn having the same distribution as  $o$ . We have

$$\begin{aligned} \mathbf{E}[\Phi(o)] &= \mathbf{E}_o \left[ \sup_{(\hat{\pi}, \hat{y}) \in \mathcal{F}} \left[ \mathbf{E}_o[\widehat{R}(o, \hat{y}, \hat{\pi})] - \widehat{R}(o, \hat{y}, \hat{\pi}) \right] \right] \\ &= \mathbf{E}_o \left[ \sup_{(\hat{\pi}, \hat{y}) \in \mathcal{F}} \mathbf{E}_{\bar{o}} \left[ \widehat{R}(\bar{o}, \hat{y}, \hat{\pi}) - \widehat{R}(o, \hat{y}, \hat{\pi}) \mid o \right] \right] \\ &= \mathbf{E}_o \left[ \sup_{(\hat{\pi}, \hat{y}) \in \mathcal{F}} \mathbf{E}_{\bar{o}} \left[ \frac{1}{|\mathcal{U}|} \sum_{(i,j) \in \mathcal{U}} r(\bar{o}_{ij}, \hat{\pi}_{ij}, \hat{y}_{ij}) - \frac{1}{|\mathcal{U}|} \sum_{(i,j) \in \mathcal{U}} r(o_{ij}, \hat{\pi}_{ij}, \hat{y}_{ij}) \mid o \right] \right] \\ &\leq \mathbf{E}_{o, \bar{o}} \left[ \sup_{(\hat{\pi}, \hat{y}) \in \mathcal{F}} \left[ \frac{1}{|\mathcal{U}|} \sum_{(i,j) \in \mathcal{U}} r(\bar{o}_{ij}, \hat{\pi}_{ij}, \hat{y}_{ij}) - \frac{1}{|\mathcal{U}|} \sum_{(i,j) \in \mathcal{U}} r(o_{ij}, \hat{\pi}_{ij}, \hat{y}_{ij}) \right] \right] \quad (\text{Jensen's Inequality}) \\ &= \mathbf{E}_{o, \bar{o}, \sigma} \left[ \sup_{(\hat{\pi}, \hat{y}) \in \mathcal{F}} \left[ \frac{1}{|\mathcal{U}|} \sum_{(i,j) \in \mathcal{U}} \sigma_{ij} r(\bar{o}_{ij}, \hat{\pi}_{ij}, \hat{y}_{ij}) - \frac{1}{|\mathcal{U}|} \sum_{(i,j) \in \mathcal{U}} \sigma_{ij} r(o_{ij}, \hat{\pi}_{ij}, \hat{y}_{ij}) \right] \right] \\ &= \mathbf{E}_{o, \bar{o}, \sigma} \left[ \sup_{(\hat{\pi}, \hat{y}) \in \mathcal{F}} \left[ \frac{1}{|\mathcal{U}|} \sum_{(i,j) \in \mathcal{U}} \sigma_{ij} r(\bar{o}_{ij}, \hat{\pi}_{ij}, \hat{y}_{ij}) + \frac{1}{|\mathcal{U}|} \sum_{(i,j) \in \mathcal{U}} \sigma_{ij} r(o_{ij}, \hat{\pi}_{ij}, \hat{y}_{ij}) \right] \right] \\ &\leq \mathbf{E}_{o, \bar{o}, \sigma} \left[ \sup_{(\hat{\pi}, \hat{y}) \in \mathcal{F}} \left[ \frac{1}{|\mathcal{U}|} \sum_{(i,j) \in \mathcal{U}} \sigma_{ij} r(\bar{o}_{ij}, \hat{\pi}_{ij}, \hat{y}_{ij}) \right] + \sup_{(\hat{\pi}, \hat{y}) \in \mathcal{F}} \left[ \frac{1}{|\mathcal{U}|} \sum_{(i,j) \in \mathcal{U}} \sigma_{ij} r(o_{ij}, \hat{\pi}_{ij}, \hat{y}_{ij}) \right] \right] \\ &= 2\mathcal{G}(\mathcal{F}, \widehat{R}). \end{aligned} \quad (11)$$

Combining Eqs. 8, 9, 10, and 11, we get Eq. 6. Another application of McDiarmid's Inequality allows us to obtain Eq. 7 from Eq. 6.  $\square$

### C. Feedback Loops

**Lemma C.1 (Binomial Tail Bound).** *If the random variable  $X_n \sim \frac{1}{n} \text{Binomial}(n, \theta)$ , then for  $\epsilon > 0$ , we have*

$$\mathbf{P}(|X_n - \theta| > \epsilon) \leq 2 \exp(-2n\epsilon^2).$$

*Proof.* Observe that  $X_n \in [0, 1]$ . Applying Hoeffding's inequality gives us the desired result.  $\square$

**Lemma C.2.** *Let  $n \in \mathbb{N}$  and  $\kappa$  be a fixed  $C - 1$  simplex such that  $\kappa_v n \in \mathbb{N} \forall v \in [C]$ . The random variable  $\tilde{q}_v \sim \frac{1}{\kappa_v n} \text{Binomial}(\kappa_v n, q_v)$ , where  $q_v \in (0, 1)$ . Assume that  $q_v > q_w$  if  $v > w$ . We denote as  $\hat{e}$  the following  $C - 1$  simplex:*

$$\hat{e} = \frac{1}{Z} [\kappa_1 \tilde{q}_1, \kappa_2 \tilde{q}_2, \dots, \kappa_C \tilde{q}_C], \quad \text{where } Z = \sum_{i \in [C]} \kappa_i \tilde{q}_i.$$

Let  $\hat{e}_{vw} = \frac{\hat{e}_v}{\hat{e}_v + \hat{e}_w} = \frac{\kappa_v \tilde{q}_v}{\kappa_v \tilde{q}_v + \kappa_w \tilde{q}_w}$  and  $\kappa_{vw} = \frac{\kappa_v}{\kappa_v + \kappa_w}$ . Then for a constant  $\rho_{vw}$  such that

$$0 < \rho_{vw} < \frac{\kappa_v \kappa_w (q_v - q_w)}{q_v \kappa_v^2 + (q_v + q_w) \kappa_v \kappa_w + q_w \kappa_w^2},$$

we have

$$\begin{aligned} |\tilde{q}_v - q_v| < \epsilon_{vw}, \quad |\tilde{q}_w - q_w| < \epsilon_{vw} &\implies \hat{e}_{vw} - \kappa_{vw} > \rho_{vw}, \\ \text{for some constant } \epsilon_{vw} \text{ s.t. } 0 < \epsilon_{vw} < &\frac{\rho_{vw} q_v \kappa_v^2 - \kappa_v \kappa_w (q_w - q_v) + q_w \rho_{vw} \kappa_v (\kappa_v - \kappa_w)}{\rho_{vw} (\kappa_v^2 - \kappa_w^2) - 2\kappa_v \kappa_w}. \end{aligned}$$

This is saying that, for  $(v, w)$  s.t.  $v > w$  the simplex  $\hat{e}$  will be more skewed towards  $v$  than the simplex  $\kappa$  if the sampled  $\tilde{q}_v$  and  $\tilde{q}_w$  are close to their mean values  $q_v$  and  $q_w$ , respectively.

*Proof.* Observe that if  $|\tilde{q}_v - q_v| < \epsilon_{vw}$  and  $|\tilde{q}_w - q_w| < \epsilon_{vw}$ , then the lowest value that  $\hat{e}_{vw}$  can take is

$$\begin{aligned}\hat{e}_{vw}^{(\min)} &= \frac{\kappa_v(q_v - \epsilon_{vw})}{\kappa_v(q_v - \epsilon_{vw}) + \kappa_w(q_w + \epsilon_{vw})}, \text{ and} \\ \hat{e}_{vw}^{(\min)} - \kappa_{vw} &> \rho_{vw} \implies \hat{e}_{vw} - \kappa_{vw} > \rho_{vw}.\end{aligned}$$

Therefore, we have

$$\begin{aligned}\hat{e}_{vw}^{(\min)} - \kappa_{vw} > \rho_{vw} \text{ and } \epsilon_{vw} < q_w \\ \iff \underbrace{\frac{\kappa_v(q_v - \epsilon_{vw})}{\kappa_v(q_v - \epsilon_{vw}) + \kappa_w(q_w + \epsilon_{vw})} - \frac{\kappa_v}{\kappa_v + \kappa_w}}_{(1)} > \rho_{vw} \text{ and } \rho_{vw} < \frac{\kappa_v \kappa_w (q_v - q_w)}{q_v \kappa_v^2 + (q_v + q_w) \kappa_v \kappa_w + q_w \kappa_w^2}.\end{aligned}$$

The inequality (1) above can further be simplified as

$$\begin{aligned}\frac{\kappa_v(q_v - \epsilon_{vw})}{\kappa_v(q_v - \epsilon_{vw}) + \kappa_w(q_w + \epsilon_{vw})} - \frac{\kappa_v}{\kappa_v + \kappa_w} &> \rho_{vw} \\ \iff \epsilon_{vw} < \frac{\rho_{vw} q_v \kappa_v^2 - \kappa_v \kappa_w (q_w - q_v) + q_w \rho_{vw} \kappa_v (\kappa_v - \kappa_w)}{\rho_{vw} (\kappa_v^2 - \kappa_w^2) - 2\kappa_v \kappa_w}.\end{aligned}$$

This completes the proof. □

**Lemma C.3.** Let  $\alpha$  be a fixed  $C - 1$  simplex and  $\hat{e}$  be the following  $G - 1$  simplex,  $\hat{e} = \frac{1}{Z}[\alpha_1 \tilde{q}_1, \alpha_2 \tilde{q}_2, \dots, \alpha_C \tilde{q}_C]$ , where  $Z = \sum_{z \in [C]} \alpha_z \tilde{q}_z$  and the vector  $\kappa \sim \frac{1}{n} \text{Multinomial}(n, \hat{e})$ . Let  $\hat{e}_{vw} = \frac{\hat{e}_v}{\hat{e}_v + \hat{e}_w} = \frac{\tilde{q}_v}{\tilde{q}_v + \tilde{q}_w}$  and  $\kappa_{vw} = \frac{\kappa_v}{\kappa_v + \kappa_w}$ .

Assume that  $|\tilde{q}_z - q_z| < \epsilon \ \forall z \in [C]$  where  $q_z \in (0, 1)$  are fixed. If  $|\kappa_v - \hat{e}_v| < \frac{\eta_{nw}}{C}$  and  $|\kappa_w - \hat{e}_w| < \frac{\eta_{nw}}{C}$ , then for some constant  $\rho$ , we have

$$\hat{e}_{vw} - \kappa_{vw} < \rho, \text{ when } \eta_{vw} < \rho \left( \frac{q_v + q_w}{\max_{z \in [C]} q_z + \epsilon} \right).$$

*Proof.* If  $|\kappa_v - \hat{e}_v| < \frac{\eta_{nw}}{C}$  and  $|\kappa_w - \hat{e}_w| < \frac{\eta_{nw}}{C}$ , then the smallest value that  $\kappa_{vw}$  can achieve is

$$\kappa_{vw}^{(\min)} = \frac{\hat{e}_v - \frac{\eta_{nw}}{C}}{\hat{e}_v + \hat{e}_w}.$$

This means that

$$\begin{aligned}\hat{e}_{vw} - \kappa_{vw} &< \rho \\ \iff \hat{e}_{vw} - \kappa_{vw}^{(\min)} &< \rho \\ \iff \frac{\eta_{nw}}{C} &< \rho \\ \iff \frac{\eta_{nw}}{C} &< \rho(\hat{e}_v + \hat{e}_w).\end{aligned}$$

Since  $|\tilde{q}_z - q_z| < \epsilon \forall z \in [C]$ , we have

$$\begin{aligned}\hat{e}_v &= \frac{\alpha_v \tilde{q}_v}{\sum_{z \in [C]} \alpha_z \tilde{q}_z} \\ &> \frac{\alpha_v (q_v - \epsilon)}{\alpha_v (q_v - \epsilon) + \sum_{z \in [C], z \neq v} \alpha_z (q_z + \epsilon)} \\ &> \frac{\alpha_v (q_v - \epsilon)}{C \max_{z \in [C]} \alpha_z (q_z + \epsilon)},\end{aligned}$$

and similarly  $\hat{e}_w > \frac{\alpha_w (q_w - \epsilon)}{C \max_{z \in [C]} \alpha_w (q_z + \epsilon)}$

$$\therefore \hat{e}_v + \hat{e}_w > \frac{\alpha_v (q_v - \epsilon) + \alpha_w (q_w - \epsilon)}{C \max_{z \in [C]} (q_z + \epsilon)}.$$

Therefore, we can set  $\eta_{vw}$  such that

$$\begin{aligned}\frac{\eta_{vw}}{C} &< \rho \left( \frac{\alpha_v (q_v - \epsilon) + \alpha_w (q_w - \epsilon)}{C \max_{z \in [C]} (q_z + \epsilon)} \right) \\ \therefore \eta_{vw} &< \rho \left( \frac{\alpha_v (q_v - \epsilon) + \alpha_w (q_w - \epsilon)}{\max_{z \in [C]} q_z + \epsilon} \right).\end{aligned}$$

□

### Proof of Theorem 5.1

**Theorem.** WLOG, assume that  $q_v > q_w$  if  $v > w$ . Let  $\kappa_{vw}^{(t)} = \frac{\kappa_v^{(t)}}{\kappa_v^{(t)} + \kappa_w^{(t)}}$ . Let  $A_{vw}^{(t)}$  represent the event that relative fraction of recommendations from  $g_v$  to that from  $g_w$  increases at time  $t$ , i.e.,  $\kappa_{vw}^{(t+1)} > \kappa_{vw}^{(t)}$ . Let  $A^{(t)}$  be the event that all relative fractions get skewed towards  $g_v$  from  $g_w$  if  $q_v > q_w$ , i.e.  $A^{(t)} = \bigcap_{(v,w) \in \mathcal{S}} A_{vw}^{(t)}$ , where  $\mathcal{S} = \{(v, w) : v \in [C], w \in [C], v > w\}$ . Then, for constants  $\epsilon, \eta > 0$  that only depend on  $\kappa^{(t)}$  and  $q$ , we have

$$\begin{aligned}\mathbf{P}(A^{(t)} | \kappa^{(t)}) &\geq 1 - 2C \left[ \exp(-2n\epsilon^2) + \exp\left(-\frac{2n\eta^2}{C^2}\right) \right] \\ &\geq 1 - 2C \exp\left(-\mathcal{O}\left(\frac{n}{C^2}\right)\right)\end{aligned}$$

*Proof.* We know that the estimated probabilities  $\hat{q}_v^{(t)}$  have distribution  $\hat{q}_v^{(t)} | \kappa^{(t)} \sim \frac{1}{n} \text{Binomial}(n\kappa_v^{(t)}, q_v)$ . The simplex with normalized probabilities is  $\hat{e}^{(t+1)} = \frac{1}{Z} [\hat{q}_1^{(t)}, \hat{q}_2^{(t)}, \dots, \hat{q}_C^{(t)}]$ , where  $Z = \sum_{z \in [C]} \hat{q}_z^{(t)}$ .

Let  $\tilde{q}_v^{(t)} = \frac{\hat{q}_v^{(t)}}{\kappa_v^{(t)}}$ . Observe that  $\tilde{q}_v^{(t)} | \kappa^{(t)} \sim \frac{1}{n\kappa_v^{(t)}} \text{Binomial}(n\kappa_v^{(t)}, q_v)$ . We denote by  $\hat{e}_{vw}^{(t+1)}$ ,

$$\hat{e}_{vw}^{(t+1)} = \frac{\hat{e}_v^{(t+1)}}{\hat{e}_v^{(t+1)} + \hat{e}_w^{(t+1)}} = \frac{\kappa_v^{(t)} \tilde{q}_v^{(t)}}{\kappa_v^{(t)} \tilde{q}_v^{(t)} + \kappa_w^{(t)} \tilde{q}_w^{(t)}}.$$

There are two main parts to the proof. First, we show that, with high probability,  $\hat{e}_{vw}^{(t+1)} - \kappa_{vw}^{(t)} > \rho \forall (v, w) \in \mathcal{S}$  for some constant  $\rho$ . Then, we show that, with high probability,  $\hat{e}_{vw}^{(t+1)} - \kappa_{vw}^{(t+1)} < \rho \forall (v, w) \in \mathcal{S}$ . We combine these two results to show that, with high probability,  $\kappa_{vw}^{(t+1)} > \kappa_{vw}^{(t)} \forall (v, w) \in \mathcal{S}$ .

Using Lemma C.2, for some  $(v, w) \in \mathcal{S}$ , we know that for some constant  $\rho_{vw}$  such that

$$0 < \rho_{vw} < \frac{\kappa_v^{(t)} \kappa_w^{(t)} (q_v - q_w)}{q_v (\kappa_v^{(t)})^2 + (q_v + q_w) \kappa_v^{(t)} \kappa_w^{(t)} + q_w (\kappa_w^{(t)})^2},$$

we have

$$\begin{aligned}
 & |\hat{q}_v^{(t)} - q_v| \leq \epsilon_{vw} \text{ and } |\hat{q}_w^{(t)} - q_w| \leq \epsilon_{vw} \implies \hat{e}_{vw}^{(t+1)} - \kappa_{vw}^{(t)} \geq \rho_{vw}, \\
 & \text{for a constant } \epsilon_{vw} \text{ s.t. } 0 < \epsilon_{vw} < \frac{\rho_{vw} q_v (\kappa_v^{(t)})^2 - \kappa_v^{(t)} \kappa_w^{(t)} (q_w - q_v) + q_w \rho_{vw} \kappa_v^{(t)} (\kappa_v^{(t)} - \kappa_w^{(t)})}{\rho_{vw} ((\kappa_v^{(t)})^2 - (\kappa_w^{(t)})^2) - 2\kappa_v^{(t)} \kappa_w^{(t)}} \\
 & \implies \mathbf{P} \left( \hat{e}_{vw}^{(t+1)} - \kappa_{vw}^{(t)} \geq \rho_{vw} \right) \geq \mathbf{P} \left( |\hat{q}_v^{(t)} - q_v| \leq \epsilon_{vw}, |\hat{q}_w^{(t)} - q_w| \leq \epsilon_{vw} \right).
 \end{aligned}$$

Intuitively, this is saying that  $\hat{e}_{vw}^{(t+1)} - \kappa_{vw}^{(t)} > \rho_{vw}$  if  $\hat{q}_v^{(t)}$  and  $\hat{q}_w^{(t)}$  are close to  $q_v$  and  $q_w$ , respectively. Let  $\rho = \min_{(v,w) \in \mathcal{S}} \rho_{vw}$  and  $\epsilon = \min_{(v,w) \in \mathcal{S}} \epsilon_{vw}$ . Then we have

$$\mathbf{P} \left( \bigcap_{(v,w) \in \mathcal{S}} \hat{e}_{vw}^{(t+1)} - \kappa_{vw}^{(t)} \geq \rho \right) \geq \mathbf{P} \left( \bigcap_{z \in [C]} |\hat{q}_z^{(t)} - q_z| \leq \epsilon \right) \quad (12)$$

$$= 1 - \mathbf{P} \left( \bigcup_{z \in [C]} |\hat{q}_z^{(t)} - q_z| \geq \epsilon \right) \quad (13)$$

$$\geq 1 - \sum_{z=1}^C \mathbf{P} \left( |\hat{q}_z^{(t)} - q_z| \geq \epsilon \right) \quad (\text{Union Bound}) \quad (14)$$

$$\begin{aligned}
 & \geq 1 - \sum_{z=1}^C 2 \exp(-2n\epsilon^2) \quad (\text{using Lemma C.1}) \\
 & = 1 - 2C \exp(-2n\epsilon^2). \quad (15)
 \end{aligned}$$

Now, we show that  $\hat{e}_{vw}^{(t+1)}$  is close to  $\kappa_{vw}^{(t+1)}$ . We know that  $\kappa^{(t+1)} \sim \frac{1}{n} \text{Multinomial}(n, \hat{e}^{(t+1)})$ . Let the event  $Q^{(t)} = \bigcap_{z \in [C]} |\hat{q}_z^{(t)} - q_z| \leq \epsilon$ . Using Lemma C.3, we know that, under  $Q^{(t)}$ , for some constant  $\eta_{vw}$ , we have

$$\begin{aligned}
 & \left| \hat{e}_v^{(t+1)} - \kappa_v^{(t+1)} \right| < \frac{\eta_{vw}}{C} \text{ and } \left| \hat{e}_w^{(t+1)} - \kappa_w^{(t+1)} \right| < \frac{\eta_{vw}}{C} \implies \hat{e}_{vw}^{(t+1)} - \kappa_{vw}^{(t+1)} < \rho, \\
 & \text{where } 0 < \eta_{vw} < \frac{\kappa_v^{(t+1)}(q_v - \epsilon) + \kappa_w^{(t+1)}(q_w - \epsilon)}{\max_{z \in [C]} \kappa_z^{(t+1)}(q_z + \epsilon)} \\
 & \implies \mathbf{P} \left( \hat{e}_{vw}^{(t+1)} - \kappa_{vw}^{(t+1)} < \rho \mid Q^{(t)} \right) \geq \mathbf{P} \left( \left| \hat{e}_v^{(t+1)} - \kappa_v^{(t+1)} \right| < \frac{\eta_{vw}}{C}, \left| \hat{e}_w^{(t+1)} - \kappa_w^{(t+1)} \right| < \frac{\eta_{vw}}{C} \right).
 \end{aligned}$$

Intuitively, this is saying that  $\hat{e}_{vw}^{(t+1)} - \kappa_{vw}^{(t+1)} < \rho$  if  $\hat{e}_v^{(t+1)}$  and  $\kappa_w^{(t+1)}$  are close to  $\hat{e}_v^{(t+1)}$  and  $\hat{e}_w^{(t+1)}$ , respectively. Thus, for  $\eta = \min_{(v,w) \in \mathcal{S}} \eta_{vw}$ , we have

$$\begin{aligned}
 & \mathbf{P} \left( \bigcap_{(v,w) \in \mathcal{S}} \hat{e}_{vw}^{(t+1)} - \kappa_{vw}^{(t+1)} \leq \rho \mid Q^{(t)} \right) \geq \mathbf{P} \left( \bigcap_{z \in [C]} |\hat{e}_z^{(t+1)} - \kappa_z^{(t+1)}| \leq \frac{\eta}{C} \right) \\
 & = 1 - \mathbf{P} \left( \bigcup_{z \in [C]} |\hat{e}_z^{(t+1)} - \kappa_z^{(t+1)}| \geq \frac{\eta}{C} \right) \\
 & \geq 1 - \sum_{z=1}^C \mathbf{P} \left( |\hat{e}_z^{(t+1)} - \kappa_z^{(t+1)}| > \frac{\eta}{C} \right) \quad (\text{Union Bound}) \\
 & \geq 1 - 2C \exp \left( -\frac{2n\eta^2}{C^2} \right) \quad (\text{using Lemma C.1}). \quad (16)
 \end{aligned}$$



Combining Eq. 15 and 16, we get the desired result as follows:

$$\begin{aligned}
 \mathbf{P} \left( \bigcap_{(v,w) \in \mathcal{S}} A_{vw}^{(t)} \right) &= \mathbf{P} \left( \bigcap_{(v,w) \in \mathcal{S}} \kappa_{vw}^{(t+1)} > \kappa_{vw}^{(t)} \right) \\
 &\geq \mathbf{P} \left( \bigcap_{(v,w) \in \mathcal{S}} \left( \widehat{e}_{vw}^{(t+1)} - \kappa_{vw}^{(t)} \geq \rho, \widehat{e}_{vw}^{(t+1)} - \kappa_{vw}^{(t+1)} \leq \rho \right) \right) \\
 &\geq \mathbf{P} \left( \bigcap_{z \in [C]} \left( |\widehat{e}_z^{(t+1)} - \kappa_z^{(t+1)}| \leq \frac{\eta}{C}, |\widehat{q}_z^{(t)} - q_z| \leq \epsilon \right) \right) \\
 &= \mathbf{P} \left( \bigcap_{z \in [C]} |\widehat{e}_z^{(t+1)} - \kappa_z^{(t+1)}| \leq \frac{\eta}{C} \mid Q^{(t)} \right) \mathbf{P} \left( \bigcap_{z \in [C]} |\widehat{q}_z^{(t)} - q_z| \leq \epsilon \right) \\
 &\geq \left( 1 - 2C \exp \left( -\frac{2n\eta^2}{C^2} \right) \right) (1 - 2C \exp(-2n\epsilon^2)) \\
 &\geq 1 - 2C \left[ \exp(-2n\epsilon^2) + \exp \left( -\frac{2n\eta^2}{C^2} \right) \right] \\
 &\geq 1 - 2C \exp \left( -\mathcal{O} \left( \frac{n}{C^2} \right) \right).
 \end{aligned}$$

□

### Proof of Theorem 5.2

**Lemma C.4** (Convergence in Probability). *Let  $X_n, Y_n,$  and  $Z$  be random variables such that  $X_n \xrightarrow{P} Y_n$  and  $Y_n \xrightarrow{P} Z$ , then  $X_n \xrightarrow{P} Z$ .*

*Proof.* For any  $\epsilon > 0$ , we have

$$\begin{aligned}
 \mathbf{P}(|X_n - Z| \geq \epsilon) &= \mathbf{P}(|X_n - Y_n + Y_n - Z| \geq \epsilon) \\
 &\leq \mathbf{P}(|X_n - Y_n| + |Y_n - Z| \geq \epsilon) \\
 &\leq \mathbf{P} \left( |X_n - Y_n| \geq \frac{\epsilon}{2} \right) + \mathbf{P} \left( |Y_n - Z| \geq \frac{\epsilon}{2} \right) \\
 &= 0.
 \end{aligned}$$

Therefore,  $X_n \xrightarrow{P} Z$ . □

**Theorem.** *Let  $q_v > q_w$ . As  $n \rightarrow \infty$ ,  $\kappa_{vw}^{(t)} \xrightarrow{P} 1 - \frac{1}{1+c^t}$ , where  $c = \frac{q_v}{q_w}$ .*

*Proof.* At time step  $t$ , the fraction of recommendations from each group is  $\kappa_t$ . From group  $g_v$ , the user cites papers according to probability  $q_v$ . Therefore,  $\widehat{q}_v^{(t)} \xrightarrow{P} \kappa_v^{(t)} q_v$ . And the normalized estimate is  $\widehat{e}^{(t+1)} = \frac{1}{S} [\kappa_1^{(t)} q_1, \dots, \kappa_C^{(t)} q_C]$ , where  $S = \sum_{z \in [C]} \kappa_z^{(t)} q_z$ . Since  $\kappa^{(t+1)} \sim \frac{1}{n} \text{Multinomial}(n, \widehat{e}^{(t+1)})$ , we have

$$\begin{aligned}
 \kappa^{(t+1)} &\xrightarrow{P} \widehat{e}^{(t+1)} \\
 \frac{\kappa_v^{(t+1)}}{\kappa_w^{(t+1)}} &\xrightarrow{P} \frac{q_v \kappa_v^{(t)}}{q_w \kappa_w^{(t)}} \\
 &= c \frac{\kappa_v^{(t)}}{\kappa_w^{(t)}}.
 \end{aligned} \tag{17}$$

*Table 5.* The distribution of the FOS in the two real-world datasets.

| FOS                   | DATASET 1 | DATASET 2 |
|-----------------------|-----------|-----------|
| ART                   | 0.03%     | 0.08%     |
| BIOLOGY               | 26.48%    | 23.43%    |
| BUSINESS              | 0.38%     | 0.10%     |
| CHEMISTRY             | 10.11%    | 15.67%    |
| COMPUTER SCIENCE      | 9.40%     | 3.42%     |
| ECONOMICS             | 2.51%     | 0.03%     |
| ENGINEERING           | 6.24%     | 17.98%    |
| ENVIRONMENTAL SCIENCE | 0.13%     | 0.03%     |
| GEOGRAPHY             | 0.48%     | 0.40%     |
| GEOLOGY               | 1.45%     | 0.46%     |
| HISTORY               | 0.04%     | 0.03%     |
| MATERIALS SCIENCE     | 3.06%     | 19.09%    |
| MATHEMATICS           | 7.17%     | 1.03%     |
| MEDICINE              | 21.28%    | 13.90%    |
| PHILOSOPHY            | 0.03%     | 0.01%     |
| PHYSICS               | 2.99%     | 3.14%     |
| POLITICAL SCIENCE     | 0.18%     | 0.01%     |
| PSYCHOLOGY            | 7.49%     | 1.14%     |
| SOCIOLOGY             | 0.55%     | 0.05%     |

We know that  $\frac{\kappa_v^{(1)}}{\kappa_w^{(1)}} \xrightarrow{p} c$ . Combining this with Eq. 17 and using Lemma C.4 recursively, we get

$$\begin{aligned}
 & \frac{\kappa_v^{(t)}}{\kappa_w^{(t)}} \xrightarrow{p} c^t \\
 \therefore 1 - \frac{1}{1 + \frac{\kappa_v^{(t)}}{\kappa_w^{(t)}}} & \xrightarrow{p} 1 - \frac{1}{1 + c^t} \quad (\text{Continuous mapping theorem}) \\
 \therefore \frac{\kappa_v^{(t)}}{\kappa_v^{(t)} + \kappa_w^{(t)}} & \xrightarrow{p} 1 - \frac{1}{1 + c^t} \\
 \therefore \kappa_{vw}^{(t)} & \xrightarrow{p} 1 - \frac{1}{1 + c^t}.
 \end{aligned}$$

□

## D. Experiments

Table 5 provides the distribution of the various FOS in both the datasets used for the real-world dataset experiments (Section 6.2). We can see that the FOS distributions are different. For example, Dataset 2 has substantially more *Materials Science* and *Engineering* papers.
